# Supplementary material for: Covalent-organic frameworks rich in nitrogen and oxygen as modified separators for lithium–sulfur batteries: pore size effects
Source: Royal Society of Chemistry journal article supplement (doi:10.1039/d5nj02214b), 2025-01-01
Supplement: d5nj02214b1.pdf [file d5nj02214b1.pdf]

## Supporting Information

### **Covalent-organic frameworks rich in nitrogen and oxygen as modified separators for lithium-sulfur batteries: pore sizes effects**

Wenhui Liu, Bo Sun, Wei Xie\*, Shiyi Han, and Yanhong Xu\*

Key Laboratory of Preparation and Application of Environmental Friendly Materials (Jilin Normal University), Ministry of Education, the Joint Laboratory of Intelligent Manufacturing of Energy and Environmental Materials, Changchun, 130103, China.

E-mail: xiew1415@163.com; xuyh198@163.com.

## **S1. Materials and Methods**

### **Experimental reagents**

All commercially available reagents and solvents were used as received without further purification, unless otherwise noted. 2,6-diaminoanthraquinone (DAAQ), 1,3,5-triformylphloroglucinol (TFP), 2,4,6-tris(4-aminophenyl)-1,3,5-triazine (TAPT) was purchased from Alfa, 2,5-dihydroxyterephthalaldehyde (DHTA) was purchased from Sanbang Chemical. All solvents used, pure sulfur, conductive carbon black, and polyvinylidene fluoride (PVDF) were purchased from Aladdin.

### **Characterizations**

PXRD data were collected on a Rigaku model RINT Ultima III diffractometer over the range of  $2\theta = 2.5 - 40^\circ$  with  $0.02^\circ$  increment. Fourier transforms Infrared (FT-IR) spectra were obtained on a Perkin-Elmer model FT-IR-frontier infrared spectrometer with potassium bromide pellet. UV-vis spectra were used for Jasco V-770 spectrometer.  $^{13}\text{C}$  cross-polarization/magic angle spinning nuclear magnetic resonance (CP/MAS NMR) analysis was conducted using AVANCEIII/WB-400. Field-emission scanning electron microscopy (FE-SEM) images were obtained on a JEOL model JSM-6700. Thermogravimetric analysis (TGA) was acquired by using a Q5000IR analyzer (TA Instruments) with an automated vertical overhead thermobalance under  $\text{N}_2$  atmosphere. X-ray photoelectron spectra (XPS) were carried out by ESCALAB250XI electron spectrometer (VG scientific, USA).  $\text{N}_2$  sorption tests were measured at 77 K with Bel Japan Inc. Model BELSORP-max analyzer. Before measurement, the samples were degassed in vacuum at  $120^\circ\text{C}$  for more than 10 h.

## **S2. Synthetic procedures**

### **Synthesis of DTQ-COF**

DTQ-COF was synthesized based on the similar procedure in previous literature.<sup>S1</sup> 1,3,5-triformylphloroglucinol (TFP, 6.3 mg, 0.03 mmol), 2,6-diaminoanthraquinone (DAAQ, 11.9 mg, 0.05 mmol), N,N-dimethylacetamide (DMA, 0.5 mL), 1,3,5-mesitylene (0.2 mL). dilute acetic acid (6 M, 0.2 mL) were added to a Pyrex tube. After sonication for 5 mins, the tube was frozen in liquid nitrogen at 77 K rapidly, and

degassed by three freeze-pump-freeze cycles, sealed under vacuum. Afterwards, the tube was heated at 120 °C for three days, after cooling to room temperature, and the red brown powder was isolated by filtration, washed repeatedly with acetone and vacuum drying at 80 °C. The isolated yield of DTQ-COF was about 74%.

### **Synthesis of DHTA-COF**

DHTA-COF was synthesized by solvothermal synthesis method according to previous literature.<sup>S2</sup> 2,4,6-tris(4-aminophenyl)-1,3,5-triazine (TAPT, 40 mg, 0.112 mmol), 2,5-dihydroxyterephthalaldehyde (DHTA, 20 mg, 0.145 mmol), 1,2-dichlorobenzene (1.6 mL), ethanol (0.5 mL), and acetic acid (6 M, 0.2 mL) were added to a Pyrex tube. Then the tube was sonicated for 5 mins, frozen in liquid nitrogen at 77 K rapidly, and degassed by three freeze-pump-freeze cycles, sealed with flame. The mixture was heated at 120 °C for three days to afford a red precipitate, which was isolated by filtration, washed with anhydrous acetone repeatedly, and vacuum drying at 80 °C to red powders with 83% isolated yield.

## **S3. Assembly of batteries and their electrochemical testing**

### **Complexes of carbon sulfur (C/S) complex and cathode electrode sheet**

In order to make carbon-sulfur complex C/S, Super-p and sublimated sulfur were mixed in a 2.5:7.5 wt. ratio and transferred to a reaction kettle lined, and heated at 155 °C for 20 h under argon atmosphere by the melt-diffusion method. Afterwards, the obtained carbon-sulfur complex C/S, Super P and the binder polyvinylidene fluoride (PVDF) were fully combined in N-methylpyrrolidone (NMP) of 8:1:1 wt. ratio. The slurry was then coated on the carbon coated aluminum foil collector, and dried in vacuum oven at 50 °C overnight. After drying, they were cut into 12 mm diameter discs to prepare cathode sheets (sulfur content 1 ~ 1.5 mg cm<sup>-2</sup>).

### **Preparation of modified separators**

A slurry was constantly prepared by mixed COFs, PVDF and Super-P (6:1:3 in weight ratio) in NMP and ball-milled for 1 h. The resulting uniformly slurry was evenly coated on the PP membrane surface and then dried in a vacuum oven at 60 °C overnight. Whereafter, the obtained separator was cut into discs with a diameter of 16

mm. The coated DTQ-COF and DHTA-COF layers thickness were measured 5.06 and 5.50  $\mu\text{m}$ . The mass loading of the coating materials were 1.85 and 1.87 mg for DTQ-COF and DHTA-COF modified separators.

### **Preparation of electrolyte**

The electrolyte was prepared by adding 1 mol  $\text{L}^{-1}$  LiTFSI and 1 wt%  $\text{LiNO}_3$  additive in a 1:1 vol. ratio of DME (1,2-dimethoxyethane) and DOL (1,3-dioxolane) magnetically stirred for 24 h. The amount of electrolyte used was 40  $\mu\text{L}$ .

### **Preparation of Li-S battery**

Coin cells were assembled inside a glovebox under argon atmosphere ( $\text{O}_2 < 0.01$  ppm,  $\text{H}_2\text{O} < 0.01$  ppm), using CR2025 button battery assembly, and put the sulfur cathode plate (diameter 12 mm), separator (diameter 16 mm), electrolyte and lithium-chip anode sheet (the lithium sheet is from Coruide and has diameter of 16 mm and thickness of 0.6 mm) in turn.

### **Electrochemical testing**

The battery test system (LANHE CT2001A) was employed to evaluate the cycling performance with a voltage range from 1.7 to 2.8 V. CV (1.7 - 2.8V, 0.1  $\text{mV s}^{-1}$ ), electrochemical impedance spectra (EIS) ( $10^{-1}$ - $10^5$  Hz) and I-t curves were measured on CHI 660E, Chenhua.

The conductivity of  $\text{Li}^+$  in the separator can be calculated using the EIS of a stainless steel symmetrical battery and formula (1-1):

$$\sigma = \frac{L}{RA} \quad (1-1)$$

In equation (1-1), L and A represent the thickness and area of the separator, respectively, and R is the bulk ohmic resistance of the electrolyte.

Using the constant potential polarization method, the I-t curve of Li/separator/Li battery structure was tested, with a polarization voltage of 0.02 V and a polarization time of 1000 s. The  $\text{Li}^+$  migration number was calculated using formula (1-2):

$$t_{\text{Li}^+} = \frac{I_S(\Delta V - I_0 R_0)}{I_0(\Delta V - I_S R_S)} \quad (1-2)$$

In equation (1-2),  $\Delta V$  represents the constant voltage applied,  $R_0$  and  $R_S$  represent the initial resistance and polarization resistance, respectively, and  $I_0$  and  $I_S$  represent the initial and steady-state current, respectively.

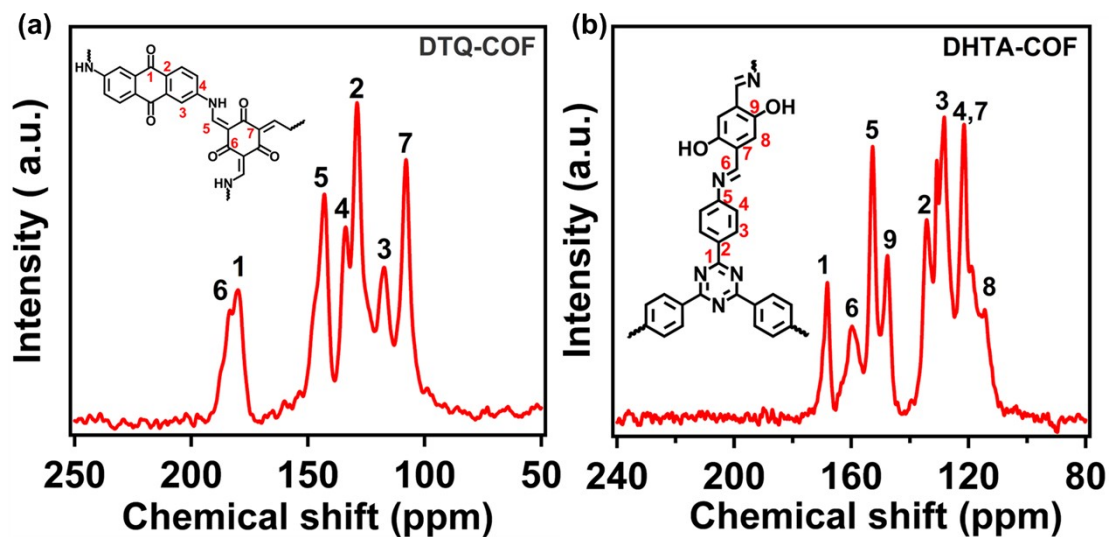

Fig. S1 The solid-state  $^{13}\text{C}$  CP-MAS NMR of (a) DTQ-COF and (b) DHTA-COF.

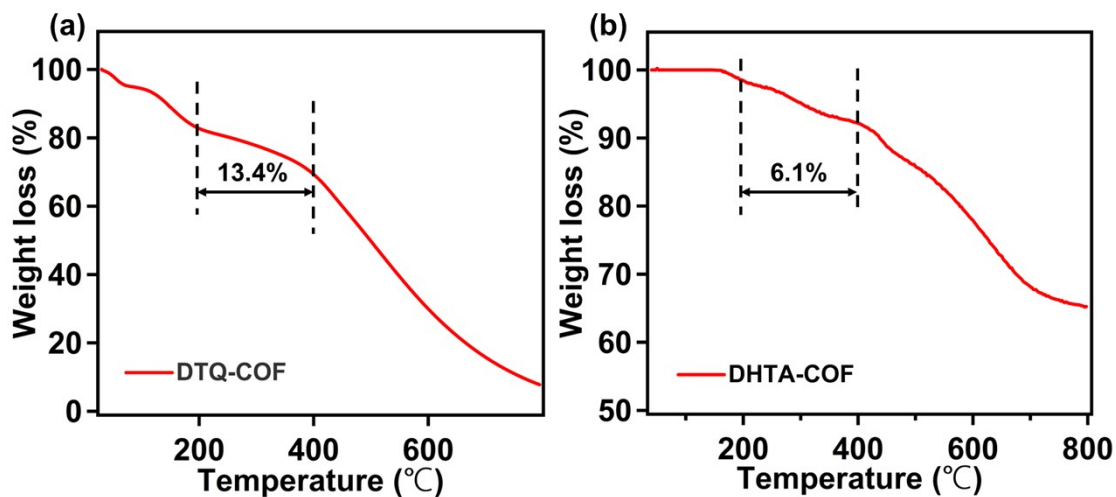

Fig. S2 TGA curves of as-synthesized (a) DTQ-COF and (b) DHTA-COF under nitrogen gas atmosphere.

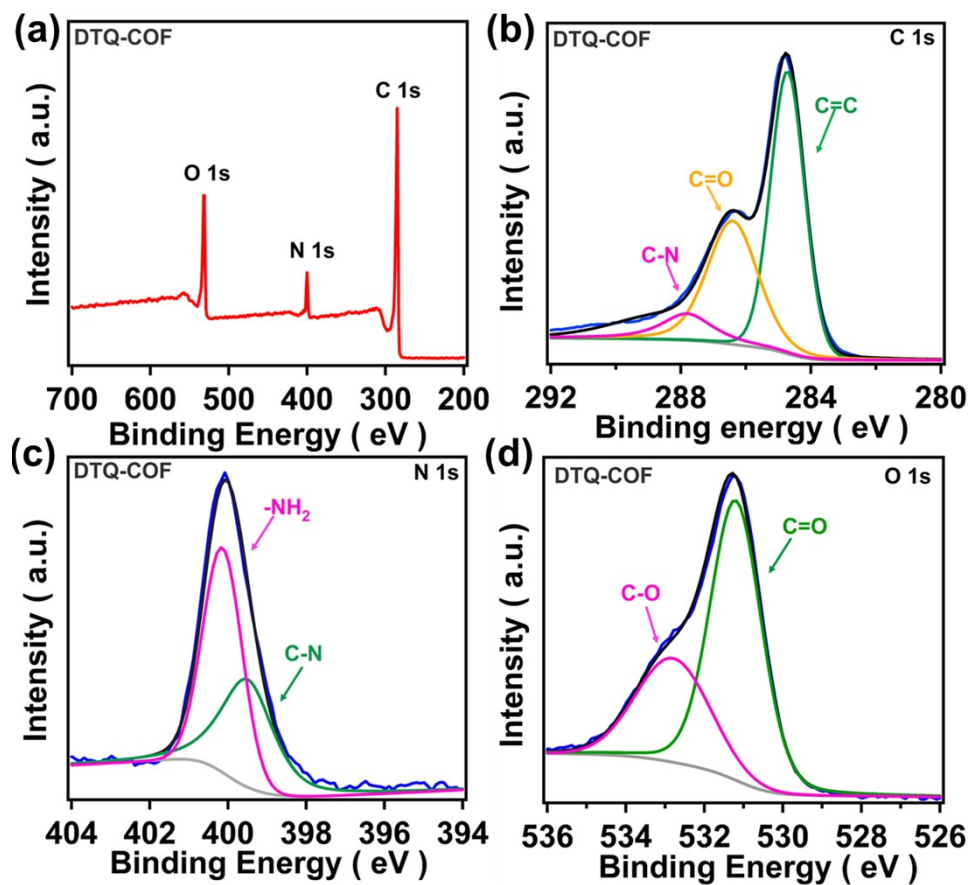

**Fig. S3** (a) XPS survey spectra of DTQ-COF, (b) C 1s, (c) N 1s and (d) O 1s spectra of DTQ-COF.

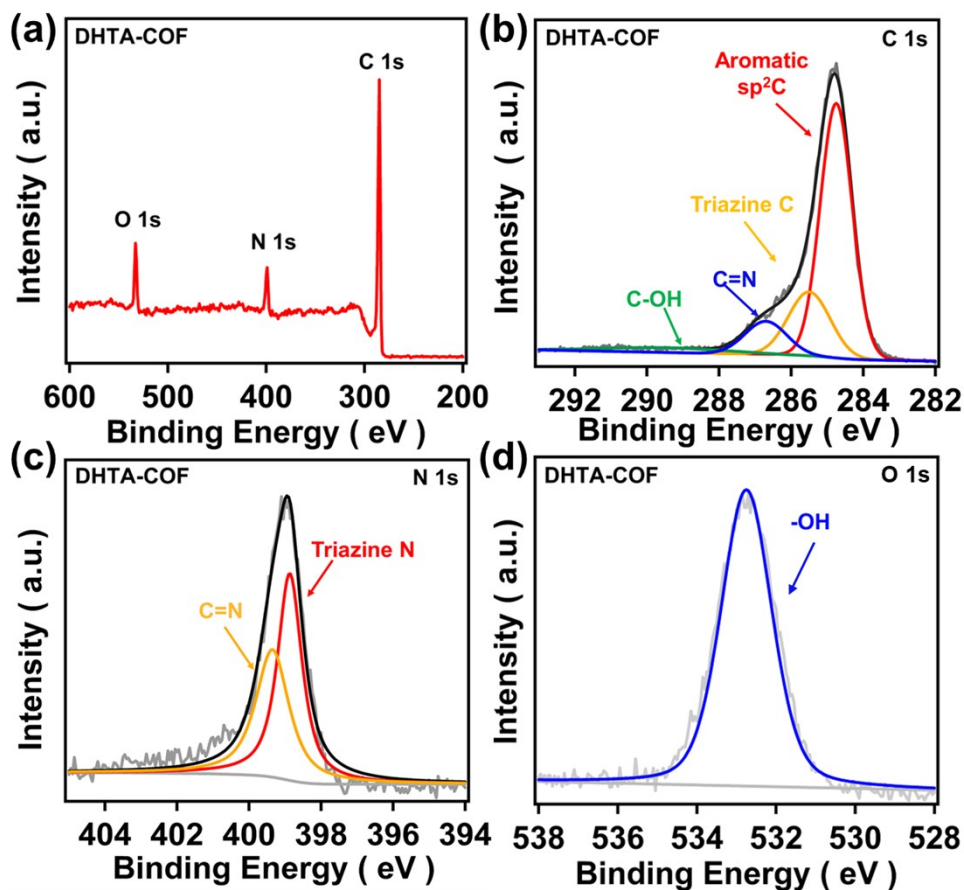

**Fig. S4** (a) XPS survey spectra of DHTA-COF, (b) C 1s, (c) N 1s and (d) O 1s spectra of DHTA-COF.

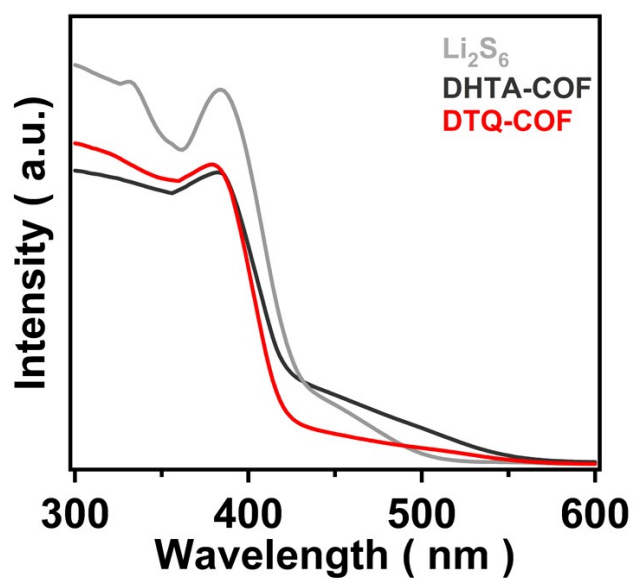

**Fig. S5** UV-vis absorption spectra of DHTA-COF and DTQ-COF in Li<sub>2</sub>S<sub>6</sub> solution.

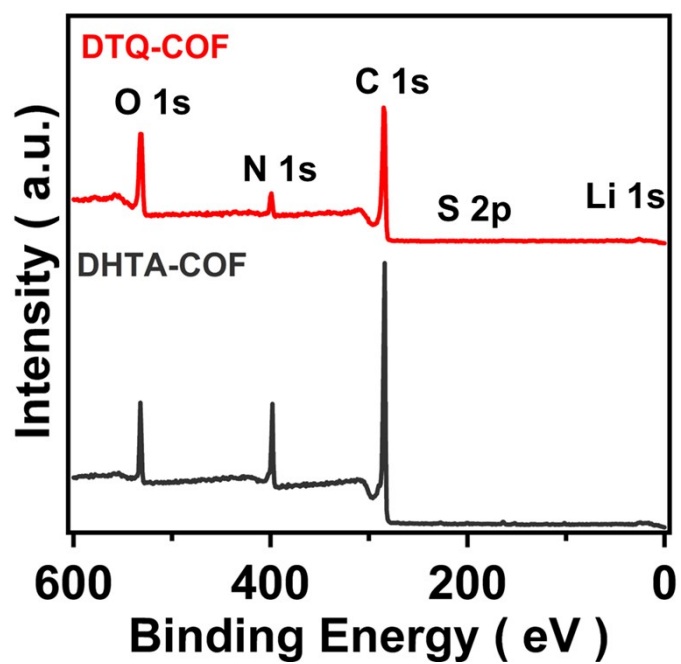

**Fig. S6** XPS survey spectra of DHTA-COF and DTQ-COF in  $\text{Li}_2\text{S}_6$  solution.

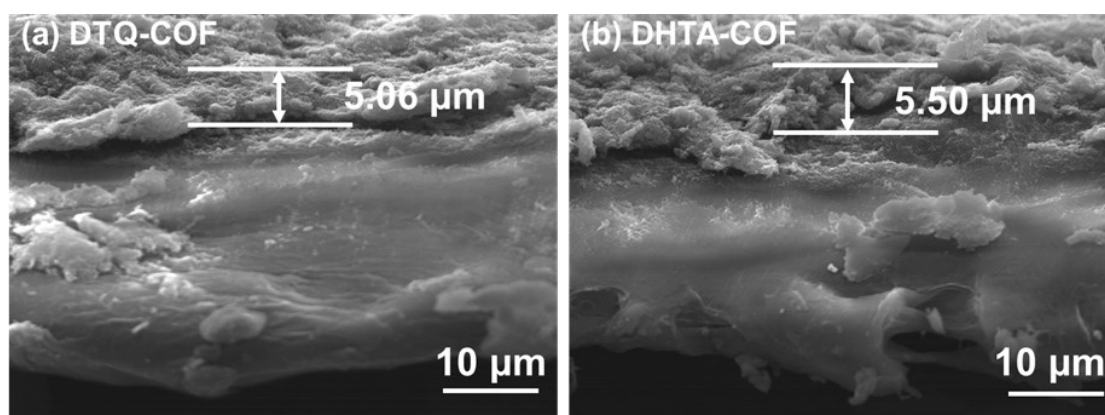

**Fig. S7** The thickness of the coated (a) DTQ-COF and (b) DHTA-COF layers.



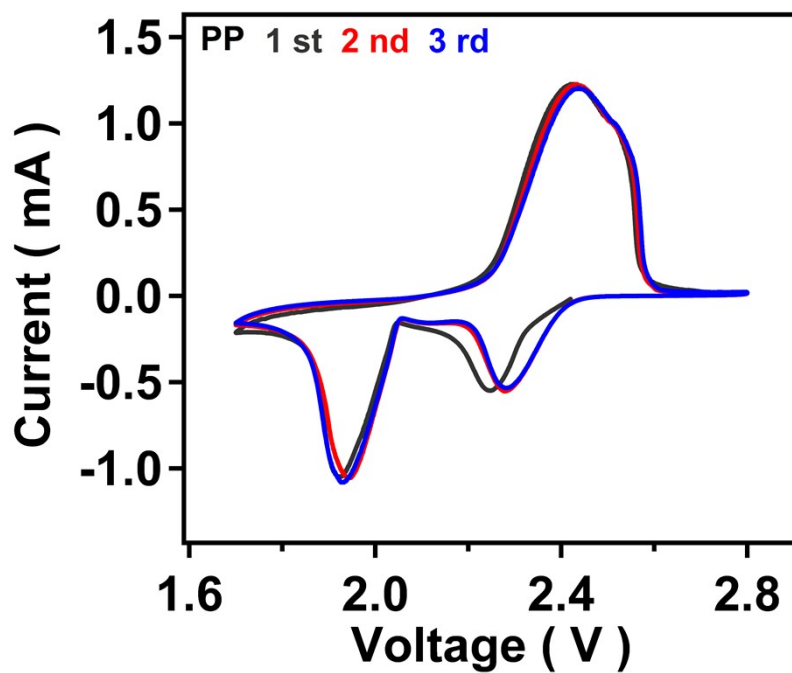

**Fig. S8** CV plots of the Li-S battery with PP separator (scan rate:  $0.1 \text{ mV s}^{-1}$ ).

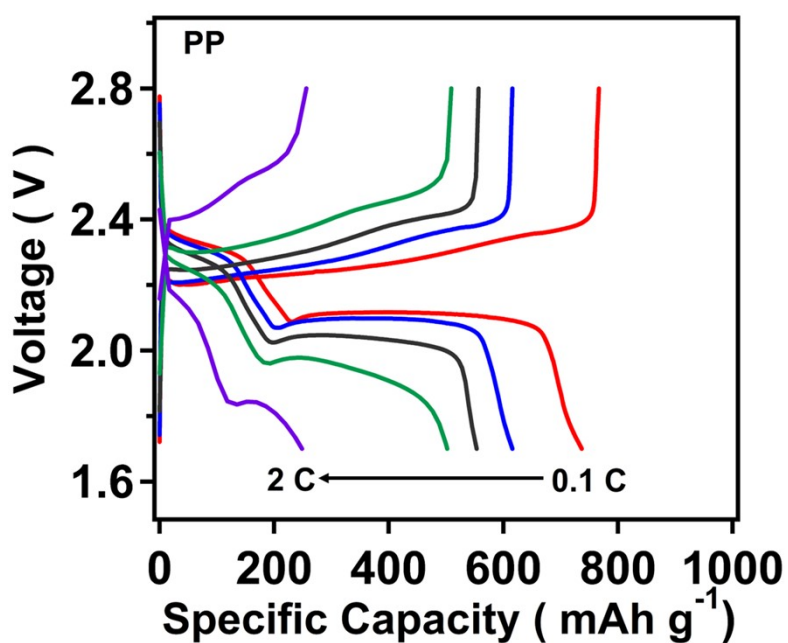

**Fig. S9** Discharge-charge graphs of PP based battery at different current densities of 0.1, 0.2, 0.5, 1 and 2 C.

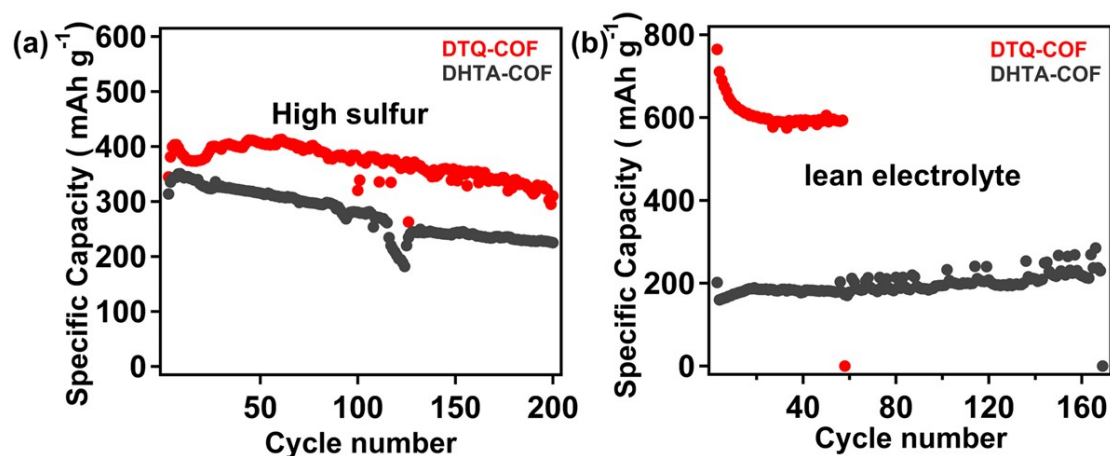

**Fig. S10** The cycle performances of DTQ-COF and DHTA-COF based cells at 1 C with (a) high sulfur areal loading (3 mg/cm<sup>2</sup>) and (b) lean electrolyte (20 µL).

**Table S1** Comparison of  $\Delta E$  values of Li-S batteries with different interlayers.

| Interlayers | 0.1 C   | 0.2 C   | 0.5 C   | 1 C     | 2 C     |
|-------------|---------|---------|---------|---------|---------|
| DTQ-COF     | 0.15 eV | 0.17 eV | 0.23 eV | 0.32 eV | 0.48 eV |
| DHTA-COF    | 0.15 eV | 0.19 eV | 0.30 eV | 0.48 eV | --      |

## Supporting references

- S1. S. Cai, R. Ma, W. Ke, H. Zhang, Y. Liu, M. Jiao, Y. Tian, Y. Fang, M. Wu, Z. Zhou, *Chem. Eng. J.*, 2024, **491**, 151979.
- S2. L. Liu, D. Cui, S. Zhang, W. Xie, C. Yao, N. Xu, Y. Xu, *Dalton. Trans.*, 2023, **52**, 6138-6145.
